# Supplementary material for: Frailty in individuals with depression, bipolar disorder and anxiety disorders: longitudinal analyses of all-cause mortality
Source: Springer Nature journal article supplement (doi:10.1186/s12916-022-02474-2), 2022-08-29
Supplement: MOESM1 [file 23435256]

# Additional file 1

This material accompanies the article

## **Frailty in individuals with depression, bipolar disorder and anxiety disorders: longitudinal analyses of all-cause mortality**

Authors: Julian Mutz, Umamah Choudhury, Jinlong Zhao and Alexandru Dregan

Published in BMC Medicine.

### **Table of contents:**

|                                                                                         |    |
|-----------------------------------------------------------------------------------------|----|
| Full criteria used to identify individuals with mental disorders .....                  | 2  |
| Frailty phenotype criteria .....                                                        | 4  |
| Frailty index variables.....                                                            | 5  |
| Overlap between frailty phenotype and frailty index categories .....                    | 7  |
| Sample characteristics stratified by sex .....                                          | 8  |
| Frailty group differences stratified by sex .....                                       | 10 |
| Sex differences in frailty index .....                                                  | 11 |
| Sex-stratified regression models .....                                                  | 12 |
| Frailty phenotype by age.....                                                           | 13 |
| Descriptive statistics follow-up.....                                                   | 14 |
| All-cause mortality by case status.....                                                 | 15 |
| All-cause mortality by frailty level .....                                              | 16 |
| Survival probabilities by frailty phenotype and case status .....                       | 17 |
| Survival probabilities by frailty index categories and case status .....                | 18 |
| All-cause mortality by frailty phenotype and case status .....                          | 19 |
| All-cause mortality by frailty index categories and case status .....                   | 20 |
| All-cause mortality by frailty phenotype and case status stratified by sex.....         | 21 |
| All-cause mortality by frailty index categories and case status stratified by sex ..... | 23 |
| Sensitivity analysis.....                                                               | 25 |
| Individuals with or without comorbid depression and anxiety disorders .....             | 25 |

## Full criteria used to identify individuals with mental disorders

Criteria below are adapted from Mutz and Lewis (1) Mutz, Young and Lewis (2) and Mutz, Hoppen, Fabbri and Lewis (3).

### **Depression**

Lifetime depression was assessed as part of the mental health follow-up questionnaire (MHQ) using a modified version of the depression module of the Composite International Diagnostic Interview Short Form (CIDI-SF) and defined according to DSM-5 criteria for major depressive disorder (4). To achieve maximum coverage of the UK Biobank study, we also included in our definition of lifetime depression individuals who had reported during the nurse-led interview at baseline that a doctor had told them that they had depression (UK Biobank data field 20002), participants who reported in response to a single-item question on the MHQ that a professional (doctors, nurse or person with specialist training such as a psychologist or a therapist) had diagnosed them with depression (field 20544), participants with a hospital inpatient record containing an ICD-10 code for depression (F32-F33), participants with a primary care record containing a Read v2 or CTV3 code for depression (see Fabbri et al. (2021) (5) for diagnostic codes and data extraction procedures), and those who were classified as individuals with probable depression according to Smith et al. (2013) (6) based on additional questions that were introduced during the later stages of the baseline assessment.

### **Bipolar disorder**

Bipolar disorder was assessed with the MHQ that included several questions on mania and hypomania in combination with the CIDI-SF to assess lifetime depression (4). We also included in our definition of bipolar disorder individuals who had reported during the nurse-led interview at baseline that a doctor had told them that they had “mania/bipolar disorder/manic depression” (field 20002), participants who responded to a single-item question on the MHQ that a professional had diagnosed them with “mania, hypomania, bipolar or manic-depression” (field 20544), participants with a hospital inpatient record containing an ICD-10 code for mania or bipolar disorder (F30-F31), participants with a primary care record containing a Read v2 or CTV3 code for bipolar disorder (see Fabbri et al. (2021) (5)), and participants who were classified as individuals with probable bipolar disorder according to Smith et al. (2013) (6) based on additional questions that were introduced during the later stages of the baseline assessment.

### **Anxiety disorders**

We used a transdiagnostic phenotype for lifetime anxiety disorders and identified cases from multiple sources: the MHQ which included the anxiety disorder module of the CIDI-SF and assessed generalised anxiety disorder according to DSM-5 criteria (4); individuals with a Generalised Anxiety Disorder Assessment (GAD-7) sum score of  $\geq 10$  (7), which was assessed as part of the MHQ; individuals who had reported “anxiety/panic attacks” during the nurse-led interview at baseline (field 20002), or “anxiety, nerves or generalized anxiety disorder”, “social anxiety or social phobia”, “any other phobia”, “panic attacks” or “agoraphobia” in response to a single-item question on the MHQ (field 20544); participants with a hospital inpatient record containing an ICD-10 code for anxiety disorders (F40-F41); participants with at least two primary care records containing a Read v2 or CTV3 code for anxiety disorders (see Fabbri et al. (2021) (5)).

### **References**

1. Mutz J, Lewis CM. Lifetime depression and age-related changes in body composition, cardiovascular function, grip strength and lung function: sex-specific analyses in the UK Biobank. *Aging*. 2021;13(13):17038-79.
2. Mutz J, Young AH, Lewis CM. Age-related changes in physiology in individuals with bipolar disorder. *Journal of Affective Disorders*. 2022;296:157-68.
3. Mutz J, Hoppen TH, Fabbri C, Lewis CM. Anxiety disorders and age-related changes in physiology. *The British Journal of Psychiatry*. 2022:1-10.

4. Davis KA, Coleman JR, Adams M, Allen N, Breen G, Cullen B, et al. Mental health in UK Biobank—development, implementation and results from an online questionnaire completed by 157 366 participants: a reanalysis. *BJPsych Open*. 2020;6(2):E18.
5. Fabbri C, Hagenaars SP, John C, Williams AT, Shrine N, Moles L, et al. Genetic and clinical characteristics of treatment-resistant depression using primary care records in two UK cohorts. *Molecular Psychiatry*. 2021.
6. Smith DJ, Nicholl BI, Cullen B, Martin D, Ul-Haq Z, Evans J, et al. Prevalence and characteristics of probable major depression and bipolar disorder within UK biobank: cross-sectional study of 172,751 participants. *PloS One*. 2013;8(11):e75362.
7. Plummer F, Manea L, Trepel D, McMillan D. Screening for anxiety disorders with the GAD-7 and GAD-2: a systematic review and diagnostic metaanalysis. *General Hospital Psychiatry*. 2016;39:24-31.

## Frailty phenotype criteria

**Table S1.** Frailty phenotype criteria

| Variable           | UK Biobank question                                                            | UK Biobank data field                                                             | Coded in frailty phenotype <sup>1</sup>                                                                                                                                                                           |
|--------------------|--------------------------------------------------------------------------------|-----------------------------------------------------------------------------------|-------------------------------------------------------------------------------------------------------------------------------------------------------------------------------------------------------------------|
| Weight loss        | “Compared with one year ago, has your weight changed?”                         | 2306                                                                              | Lost weight = 1<br>Other = 0                                                                                                                                                                                      |
| Exhaustion         | “Over the past two weeks, how often have you felt tired or had little energy?” | 120107                                                                            | More than half the days = 1<br>Nearly every day = 1<br>Other = 0                                                                                                                                                  |
| Physical activity  | “In the last 4 weeks did you spend any time doing the following [activities]?” | 6164 <sup>2</sup><br>1011 (frequency light DIY)                                   | No physical activity = 1<br>Light DIY ( $\leq 1/\text{week}$ ) = 1<br>Light DIY ( $\geq 2\text{-}3/\text{week}$ ) = 0<br>Heavy DIY = 0<br>Walking for pleasure = 0<br>Other exercises = 0<br>Strenuous sports = 0 |
| Walking speed      | “How would you describe your usual walking pace?”                              | 924                                                                               | Slow = 1<br>Other = 0                                                                                                                                                                                             |
| Hand-grip strength | Measured during the baseline assessment                                        | 46 (left hand)<br>47 (right hand)<br>1707 (handedness)<br>31 (sex)<br>21001 (BMI) | Maximal grip strength of self-reported dominant hand (adjusted for sex and BMI) <sup>3</sup> .<br>Below 20th %tile = 1<br>Equal or above 20th %tile = 0                                                           |

*Note.* BMI = body mass index; DIY = do-it-yourself. <sup>1</sup> “do not know” or “prefer not to answer” were coded as missing data. <sup>2</sup> array variables. <sup>3</sup> grip strength was regressed on sex and BMI, and the residuals from this regression were used to identify individuals in the bottom 20% of the distribution. Criteria adapted from frailty phenotype by Fried et al. (2001), doi: 10.1093/gerona/56.3.m146 and Hanlon et al. (2018), doi: 10.1016/S2468-2667(18)30091-4.

## Frailty index variables

**Table S2.** Variables included in the frailty index

| Type of deficit  | Item      | Variable                                          | UK Biobank data field <sup>1</sup>                     | Coded in frailty index                                                                         |                                                               |
|------------------|-----------|---------------------------------------------------|--------------------------------------------------------|------------------------------------------------------------------------------------------------|---------------------------------------------------------------|
| Sensory          | 1         | Glaucoma <sup>2</sup>                             | 6148 <sup>3</sup><br>2227<br>20002 <sup>3</sup> (1277) | Yes = 1<br>No = 0                                                                              |                                                               |
|                  | 2         | Cataracts <sup>2</sup>                            | 6148 <sup>3</sup><br>2227<br>20002 <sup>3</sup> (1278) | Yes = 1<br>No = 0                                                                              |                                                               |
|                  | 3         | Hearing difficulty/problems                       | 2247                                                   | Yes = 1<br>I am completely deaf = 1<br>No = 0                                                  |                                                               |
| Cranial          | 4         | Migraine <sup>2</sup>                             | 2473<br>20002 <sup>3</sup> (1265)                      | Yes = 1<br>No = 0                                                                              |                                                               |
|                  | 5         | Mouth/teeth dental problems                       | 6149                                                   | Any = 1<br>None of the above = 0                                                               |                                                               |
| Mental wellbeing | 6         | Overall health rating                             | 2178                                                   | Poor = 1<br>Fair = 0.5<br>Good = 0.25<br>Excellent = 0                                         |                                                               |
|                  | 7         | Frequency of tiredness/lethargy in last two weeks | 2080                                                   | Nearly every day = 1<br>More than half the days = 0.5<br>Several days = 0.25<br>None = 0       |                                                               |
|                  | 8         | Sleeplessness/insomnia                            | 1200                                                   | Usually = 1<br>Sometimes = 0.5<br>Never/rarely = 0                                             |                                                               |
|                  | 9         | Frequency of depressed mood in last two weeks     | 2050                                                   | Nearly every day = 1<br>More than half the days = 0.75<br>Several days = 0.5<br>Not at all = 0 |                                                               |
|                  | 10        | Nervous feelings                                  | 1970                                                   | Yes = 1<br>No = 0                                                                              |                                                               |
|                  | 11        | Anxiety / panic attacks <sup>2</sup>              | 2473<br>20002 <sup>3</sup> (1287)                      | Yes = 1<br>No = 0                                                                              |                                                               |
|                  | 12        | Loneliness, isolation                             | 2020                                                   | Yes = 1<br>No = 0                                                                              |                                                               |
|                  | 13        | Miserableness                                     | 1930                                                   | Yes = 1<br>No = 0                                                                              |                                                               |
|                  | Infirmity | 14                                                | Long-standing illness, disability or infirmity         | 2188                                                                                           | Yes = 1<br>No = 0                                             |
|                  |           | 15                                                | Falls in the last year                                 | 2296                                                                                           | More than one fall = 1<br>Only one fall = 0.5<br>No falls = 0 |
| 16               |           | Fractured/broken bones in last five years         | 2463                                                   | Yes = 1<br>No = 0                                                                              |                                                               |
| Cardiometabolic  | 17        | Diabetes <sup>2</sup>                             | 2443<br>20002 <sup>3</sup> (1220 & 1223)               | Yes = 1<br>No = 0                                                                              |                                                               |
|                  | 18        | Myocardial infarction <sup>2</sup>                | 6150 <sup>3</sup><br>20002 <sup>3</sup> (1075)         | Yes = 1<br>No = 0                                                                              |                                                               |
|                  | 19        | Angina <sup>2</sup>                               | 6150 <sup>3</sup><br>20002 <sup>3</sup> (1074)         | Yes = 1<br>No = 0                                                                              |                                                               |
|                  | 20        | Stroke / ischaemic stroke <sup>2</sup>            | 6150 <sup>3</sup><br>20002 <sup>3</sup> (1081 & 1583)  | Yes = 1<br>No = 0                                                                              |                                                               |
|                  | 21        | Hypertension <sup>2</sup>                         | 6150 <sup>3</sup><br>20002 <sup>3</sup> (1065)         | Yes = 1<br>No = 0                                                                              |                                                               |
|                  | 22        | Hypothyroidism <sup>2</sup>                       | 2473<br>20002 <sup>3</sup> (1226)                      | Yes = 1<br>No = 0                                                                              |                                                               |
|                  | 23        | Deep venous thrombosis <sup>2</sup>               | 6152 <sup>3</sup><br>20002 <sup>3</sup> (1094)         | Yes = 1<br>No = 0                                                                              |                                                               |
|                  | 24        | Cholesterol lowering medication use               | 6153 (Females)<br>6177 (Males)                         | Yes = 1<br>No = 0                                                                              |                                                               |
| Respiratory      | 25        | Wheeze or whistling in the chest in last year     | 2316                                                   | Yes = 1<br>No = 0                                                                              |                                                               |
|                  | 26        | Pneumonia <sup>2</sup>                            | 2473<br>20002 <sup>3</sup> (1398)                      | Yes = 1<br>No = 0                                                                              |                                                               |
|                  | 27        | Emphysema / chronic bronchitis <sup>2</sup>       | 6152 <sup>3</sup><br>20002 <sup>3</sup> (1113)         | Yes = 1<br>No = 0                                                                              |                                                               |
|                  | 28        | Asthma <sup>2</sup>                               | 6152 <sup>3</sup>                                      | Yes = 1                                                                                        |                                                               |

|                  |                                                    |                                                                 |                                  |                 |
|------------------|----------------------------------------------------|-----------------------------------------------------------------|----------------------------------|-----------------|
|                  |                                                    |                                                                 | 20002 <sup>3</sup> (1111)        | No = 0          |
| Musculoskeletal  | 29                                                 | Rheumatoid arthritis <sup>2</sup>                               | 2473                             | Yes = 1         |
|                  |                                                    |                                                                 | 20002 <sup>3</sup> (1464)        | No = 0          |
|                  | 30                                                 | Osteoarthritis <sup>2</sup>                                     | 2473                             | Yes = 1         |
|                  |                                                    |                                                                 | 20002 <sup>3</sup> (1465)        | No = 0          |
|                  | 31                                                 | Gout <sup>2</sup>                                               | 2473                             | Yes = 1         |
|                  |                                                    | 20002 <sup>3</sup> (1466)                                       | No = 0                           |                 |
|                  | 32                                                 | Osteoporosis <sup>2</sup>                                       | 2473                             | Yes = 1         |
|                  |                                                    |                                                                 | 20002 <sup>3</sup> (1309)        | No = 0          |
| Immunological    | 33                                                 | Hay fever / allergic rhinitis or eczema/dermatitis <sup>2</sup> | 6152 <sup>3</sup>                | Yes = 1         |
|                  |                                                    |                                                                 | 20002 <sup>3</sup> (1387 & 1452) | No = 0          |
|                  | 34                                                 | Psoriasis <sup>2</sup>                                          | 2473                             | Yes = 1         |
|                  |                                                    |                                                                 | 20002 <sup>3</sup> (1453)        | No = 0          |
| Cancer           | 35                                                 | Any cancer diagnosis <sup>2</sup>                               | 134                              | At least 1 = 1  |
|                  |                                                    |                                                                 | 2453                             | Yes = 1         |
|                  |                                                    |                                                                 |                                  | No = 0          |
|                  | 36                                                 | Multiple cancers diagnosed <sup>2</sup>                         | 134                              | More than 1 = 1 |
|                  |                                                    |                                                                 |                                  | 0 or 1 = 0      |
| Pain             | 37                                                 | Chest pain or discomfort                                        | 2335                             | Yes = 1         |
|                  |                                                    |                                                                 |                                  | No = 0          |
|                  | 38                                                 | Headache / neck or shoulder pain (in last month)                | 6159 <sup>3</sup>                | Yes = 1         |
|                  |                                                    |                                                                 |                                  | No = 0          |
|                  | 39                                                 | Back pain (in last month)                                       | 6159 <sup>3</sup>                | Yes = 1         |
|                  |                                                    |                                                                 |                                  | No = 0          |
|                  | 40                                                 | Stomach or abdominal pain (in last month)                       | 6159 <sup>3</sup>                | Yes = 1         |
|                  |                                                    |                                                                 |                                  | No = 0          |
|                  | 41                                                 | Hip pain (in last month)                                        | 6159 <sup>3</sup>                | Yes = 1         |
|                  |                                                    |                                                                 |                                  | No = 0          |
| 42               | Knee pain (in last month)                          | 6159 <sup>3</sup>                                               | Yes = 1                          |                 |
|                  |                                                    |                                                                 | No = 0                           |                 |
| 43               | Pain all over the body (in last month)             | 6159 <sup>3</sup>                                               | Yes = 1                          |                 |
|                  |                                                    |                                                                 | No = 0                           |                 |
| 44               | Facial pain (in last month)                        | 6159 <sup>3</sup>                                               | Yes = 1                          |                 |
|                  |                                                    |                                                                 | No = 0                           |                 |
| 45               | Sciatica <sup>2</sup>                              | 2473                                                            | Yes = 1                          |                 |
|                  |                                                    | 20002 <sup>3</sup> (1476)                                       | No = 0                           |                 |
| Gastrointestinal | 46                                                 | Gastro-oesophageal reflux / gastric reflux <sup>2</sup>         | 2473                             | Yes = 1         |
|                  |                                                    |                                                                 | 20002 <sup>3</sup> (1138)        | No = 0          |
|                  | 47                                                 | Hiatus hernia <sup>2</sup>                                      | 2473                             | Yes = 1         |
|                  |                                                    |                                                                 | 20002 <sup>3</sup> (1474)        | No = 0          |
|                  | 48                                                 | Cholelithiasis / gall stones <sup>2</sup>                       | 2473                             | Yes = 1         |
|                  |                                                    | 20002 <sup>3</sup> (1162)                                       | No = 0                           |                 |
| 49               | Diverticular disease / diverticulitis <sup>2</sup> | 2473                                                            | Yes = 1                          |                 |
|                  |                                                    | 20002 <sup>3</sup> (1458)                                       | No = 0                           |                 |

*Note:* Variables included in frailty index from Williams et al. (2019), doi: 10.1093/gerona/gly094. <sup>1</sup> numbers shown in parentheses are UK Biobank diagnostic codes. <sup>2</sup> conditions diagnosed by a doctor. <sup>3</sup> array variables. For all items with only one corresponding data field, including item 24, “do not know” or “prefer not to answer” responses were coded as missing data. For items with multiple corresponding data fields, we first coded “Yes” and “No” responses using the self-report items and, including for data field 2473, “prefer not to answer” responses as missing data. Additional “Yes” responses were then ascertained from the nurse-led interview diagnostic codes (data field 20002). Individuals with missing data for both data fields 2473 and 20002 were coded as missing data. Items 1 and 2 were coded as “No” if data field 2227 was coded “No” or if data field 6148 was coded “do not know” and data field 20002 was coded “No”. Item 17 was coded as “No” if data field 2443 was coded “do not know” and data field 20002 was coded “No”. For item 35, “do not know” or “prefer not to answer” responses from data field 2453 were coded as missing data unless participants had at least one cancer for data field 134. For data fields, only data from the first instance (i.e., the baseline assessment) were used.

Overlap between frailty phenotype and frailty index categories

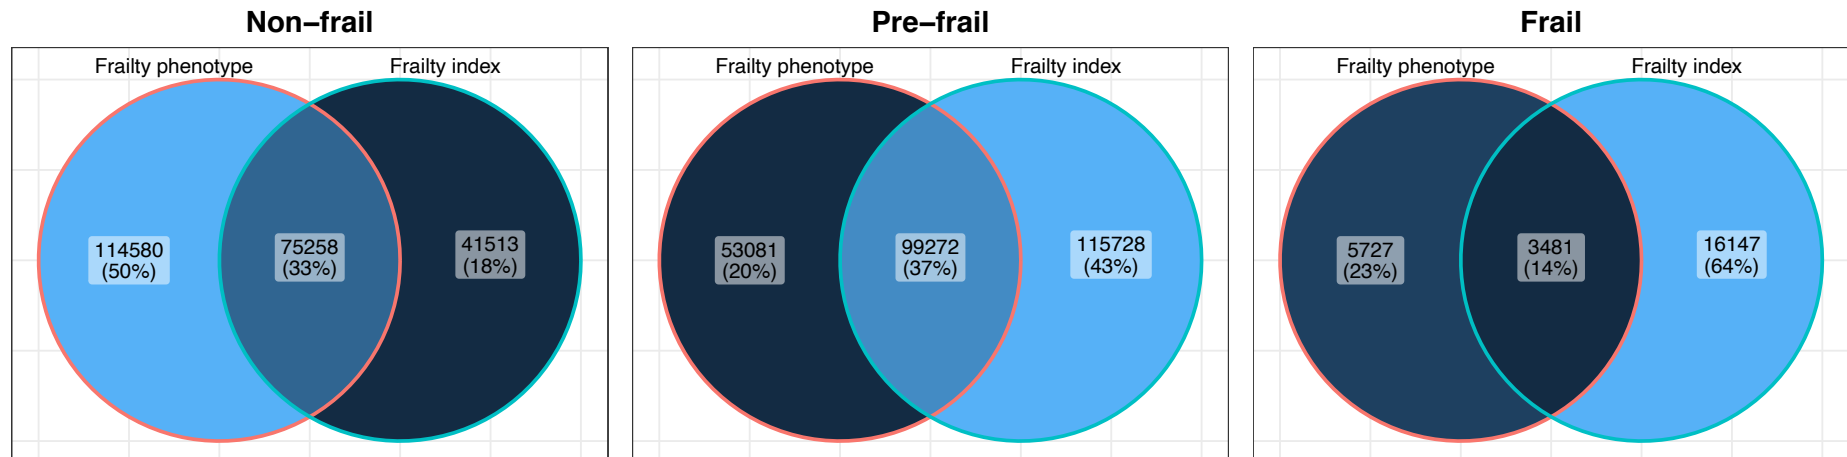

**Figure S1.** Venn diagram showing the overlap between individuals with different frailty levels according to the frailty phenotype and frailty index categories. Cut-offs for frailty index categories were non frail ( $\leq 0.08$ ), pre-frail ( $> 0.08$  and  $< 0.25$ ) and frail ( $\geq 0.25$ ).

## Sample characteristics stratified by sex

**Table S3.** Sample characteristics of individuals with and without mental disorders stratified by sex

|                                    | Depression     |                | Bipolar disorder |                | Anxiety disorder |                | No disorder    |                |
|------------------------------------|----------------|----------------|------------------|----------------|------------------|----------------|----------------|----------------|
|                                    | Males          | Females        | Males            | Females        | Males            | Females        | Males          | Females        |
|                                    | N=26546        | N=50040        | N=1319           | N=1710         | N=12835          | N=24944        | N=111347       | N=109447       |
| <b>Age</b>                         |                |                |                  |                |                  |                |                |                |
| Mean (SD)                          | 56.01 (8.04)   | 54.67 (7.81)   | 55.38 (8.28)     | 53.49 (7.68)   | 56.43 (7.95)     | 55.35 (7.84)   | 56.67 (8.27)   | 56.19 (8.01)   |
| <b>Neighbourhood deprivation</b>   |                |                |                  |                |                  |                |                |                |
| Mean (SD)                          | -1.48 (2.92)   | -1.48 (2.90)   | -1.21 (2.99)     | -1.01 (3.04)   | -1.64 (2.88)     | -1.61 (2.86)   | -1.78 (2.83)   | -1.77 (2.82)   |
| <b>Ethnicity</b>                   |                |                |                  |                |                  |                |                |                |
| White                              | 25654 (96.6%)  | 48214 (96.4%)  | 1247 (94.5%)     | 1608 (94.0%)   | 12481 (97.2%)    | 24273 (97.3%)  | 105743 (95.0%) | 103508 (94.6%) |
| Mixed-race                         | 129 (0.5%)     | 393 (0.8%)     | 14 (1.1%)        | 14 (0.8%)      | 52 (0.4%)        | 139 (0.6%)     | 459 (0.4%)     | 646 (0.6%)     |
| Black                              | 148 (0.6%)     | 465 (0.9%)     | 10 (0.8%)        | 31 (1.8%)      | 51 (0.4%)        | 197 (0.8%)     | 1479 (1.3%)    | 1801 (1.6%)    |
| Asian                              | 415 (1.6%)     | 540 (1.1%)     | 30 (2.3%)        | 37 (2.2%)      | 176 (1.4%)       | 175 (0.7%)     | 2513 (2.3%)    | 2008 (1.8%)    |
| Chinese                            | 31 (0.1%)      | 89 (0.2%)      | 4 (0.3%)         | 2 (0.1%)       | 15 (0.1%)        | 27 (0.1%)      | 322 (0.3%)     | 500 (0.5%)     |
| Other                              | 169 (0.6%)     | 339 (0.7%)     | 14 (1.1%)        | 18 (1.1%)      | 60 (0.5%)        | 133 (0.5%)     | 831 (0.7%)     | 984 (0.9%)     |
| <b>Highest qualification</b>       |                |                |                  |                |                  |                |                |                |
| None                               | 3836 (14.5%)   | 6806 (13.6%)   | 147 (11.1%)      | 169 (9.9%)     | 1737 (13.5%)     | 3460 (13.9%)   | 17361 (15.6%)  | 18308 (16.7%)  |
| O levels/GCSEs/CSEs                | 6495 (24.5%)   | 14814 (29.6%)  | 316 (24.0%)      | 478 (28.0%)    | 3008 (23.4%)     | 7457 (29.9%)   | 27863 (25.0%)  | 33649 (30.7%)  |
| A levels/NVQ/HND/HNC <sup>1</sup>  | 6346 (23.9%)   | 11759 (23.5%)  | 308 (23.4%)      | 406 (23.7%)    | 3087 (24.1%)     | 5844 (23.4%)   | 27070 (24.3%)  | 24198 (22.1%)  |
| Degree                             | 9869 (37.2%)   | 16661 (33.3%)  | 548 (41.5%)      | 657 (38.4%)    | 5003 (39.0%)     | 8183 (32.8%)   | 39053 (35.1%)  | 33292 (30.4%)  |
| <b>Spouse/partner cohabitation</b> |                |                |                  |                |                  |                |                |                |
| No                                 | 2418 (9.1%)    | 8446 (16.9%)   | 149 (11.3%)      | 372 (21.8%)    | 1041 (8.1%)      | 3695 (14.8%)   | 6839 (6.1%)    | 12309 (11.2%)  |
| Yes                                | 24128 (90.9%)  | 41594 (83.1%)  | 1170 (88.7%)     | 1338 (78.2%)   | 11794 (91.9%)    | 21249 (85.2%)  | 104508 (93.9%) | 97138 (88.8%)  |
| <b>Smoking status</b>              |                |                |                  |                |                  |                |                |                |
| Never                              | 11985 (45.1%)  | 27637 (55.2%)  | 549 (41.6%)      | 859 (50.2%)    | 5884 (45.8%)     | 13984 (56.1%)  | 57470 (51.6%)  | 69387 (63.4%)  |
| Former                             | 11075 (41.7%)  | 17246 (34.5%)  | 534 (40.5%)      | 588 (34.4%)    | 5424 (42.3%)     | 8704 (34.9%)   | 42640 (38.3%)  | 32725 (29.9%)  |
| Current                            | 3486 (13.1%)   | 5157 (10.3%)   | 236 (17.9%)      | 263 (15.4%)    | 1527 (11.9%)     | 2256 (9.0%)    | 11237 (10.1%)  | 7335 (6.7%)    |
| <b>Alcohol intake frequency</b>    |                |                |                  |                |                  |                |                |                |
| Never                              | 1850 (7.0%)    | 4392 (8.8%)    | 140 (10.6%)      | 189 (11.1%)    | 882 (6.9%)       | 2281 (9.1%)    | 5313 (4.8%)    | 8998 (8.2%)    |
| Special occasions                  | 2069 (7.8%)    | 7418 (14.8%)   | 107 (8.1%)       | 303 (17.7%)    | 890 (6.9%)       | 3662 (14.7%)   | 6941 (6.2%)    | 14413 (13.2%)  |
| 1-3/month                          | 2646 (10.0%)   | 6668 (13.3%)   | 117 (8.9%)       | 235 (13.7%)    | 1172 (9.1%)      | 3084 (12.4%)   | 9269 (8.3%)    | 13411 (12.3%)  |
| 1-2/week                           | 6489 (24.4%)   | 12612 (25.2%)  | 295 (22.4%)      | 429 (25.1%)    | 3071 (23.9%)     | 6200 (24.9%)   | 29518 (26.5%)  | 29679 (27.1%)  |
| 3-4/week                           | 6600 (24.9%)   | 10366 (20.7%)  | 314 (23.8%)      | 264 (15.4%)    | 3256 (25.4%)     | 5298 (21.2%)   | 31255 (28.1%)  | 24668 (22.5%)  |
| Daily/almost daily                 | 6892 (26.0%)   | 8584 (17.2%)   | 346 (26.2%)      | 290 (17.0%)    | 3564 (27.8%)     | 4419 (17.7%)   | 29051 (26.1%)  | 18278 (16.7%)  |
| <b>Body mass index</b>             |                |                |                  |                |                  |                |                |                |
| Mean (SD)                          | 28.14 (4.39)   | 27.44 (5.38)   | 28.51 (4.66)     | 27.88 (5.84)   | 27.85 (4.27)     | 27.10 (5.26)   | 27.67 (3.96)   | 26.69 (4.83)   |
| <b>Systolic blood pressure</b>     |                |                |                  |                |                  |                |                |                |
| Mean (SD)                          | 139.23 (16.74) | 132.76 (18.47) | 137.58 (16.81)   | 130.86 (17.65) | 139.91 (16.84)   | 133.81 (18.73) | 141.31 (17.35) | 135.92 (19.43) |
| <b>Diastolic blood pressure</b>    |                |                |                  |                |                  |                |                |                |
| Mean (SD)                          | 83.78 (9.93)   | 80.35 (9.92)   | 83.38 (10.08)    | 80.10 (9.97)   | 83.94 (9.84)     | 80.49 (9.90)   | 84.18 (9.88)   | 80.78 (9.95)   |
| <b>Cholesterol</b>                 |                |                |                  |                |                  |                |                |                |
| Mean (SD)                          | 5.49 (1.14)    | 5.84 (1.12)    | 5.49 (1.14)      | 5.81 (1.14)    | 5.49 (1.12)      | 5.86 (1.12)    | 5.53 (1.11)    | 5.88 (1.12)    |
| <b>Multimorbidity count</b>        |                |                |                  |                |                  |                |                |                |



|                                 |               |               |              |              |               |               |                 |                 |
|---------------------------------|---------------|---------------|--------------|--------------|---------------|---------------|-----------------|-----------------|
| None                            | 4160 (15.7%)  | 8529 (17.0%)  | 171 (13.0%)  | 209 (12.2%)  | 1960 (15.3%)  | 3970 (15.9%)  | 31250 (28.1%)   | 31266 (28.6%)   |
| One                             | 6301 (23.7%)  | 11948 (23.9%) | 275 (20.8%)  | 376 (22.0%)  | 3002 (23.4%)  | 5788 (23.2%)  | 31513 (28.3%)   | 31147 (28.5%)   |
| Two                             | 5474 (20.6%)  | 10286 (20.6%) | 272 (20.6%)  | 348 (20.4%)  | 2721 (21.2%)  | 5218 (20.9%)  | 22275 (20.0%)   | 21283 (19.4%)   |
| Three                           | 4059 (15.3%)  | 7597 (15.2%)  | 242 (18.3%)  | 274 (16.0%)  | 2025 (15.8%)  | 3909 (15.7%)  | 13069 (11.7%)   | 12402 (11.3%)   |
| Four                            | 2765 (10.4%)  | 4720 (9.4%)   | 136 (10.3%)  | 206 (12.0%)  | 1342 (10.5%)  | 2442 (9.8%)   | 6800 (6.1%)     | 6574 (6.0%)     |
| Five or more                    | 3787 (14.3%)  | 6960 (13.9%)  | 223 (16.9%)  | 297 (17.4%)  | 1785 (13.9%)  | 3617 (14.5%)  | 6440 (5.8%)     | 6775 (6.2%)     |
| <b>Antidepressant use</b>       |               |               |              |              |               |               |                 |                 |
| No                              | 21687 (81.7%) | 38639 (77.2%) | 988 (74.9%)  | 1187 (69.4%) | 10598 (82.6%) | 19271 (77.3%) | 111347 (100.0%) | 109447 (100.0%) |
| Yes                             | 4859 (18.3%)  | 11401 (22.8%) | 331 (25.1%)  | 523 (30.6%)  | 2237 (17.4%)  | 5673 (22.7%)  | 0 (0.0%)        | 0 (0.0%)        |
| <b>Antipsychotic use</b>        |               |               |              |              |               |               |                 |                 |
| No                              | 26433 (99.6%) | 49843 (99.6%) | 1245 (94.4%) | 1582 (92.5%) | 12764 (99.4%) | 24822 (99.5%) | 111347 (100.0%) | 109447 (100.0%) |
| Yes                             | 113 (0.4%)    | 197 (0.4%)    | 74 (5.6%)    | 128 (7.5%)   | 71 (0.6%)     | 122 (0.5%)    | 0 (0.0%)        | 0 (0.0%)        |
| <b>Lithium use</b>              |               |               |              |              |               |               |                 |                 |
| No                              | 26514 (99.9%) | 49972 (99.9%) | 1184 (89.8%) | 1571 (91.9%) | 12824 (99.9%) | 24916 (99.9%) | 111347 (100.0%) | 109447 (100.0%) |
| Yes                             | 32 (0.1%)     | 68 (0.1%)     | 135 (10.2%)  | 139 (8.1%)   | 11 (0.1%)     | 28 (0.1%)     | 0 (0.0%)        | 0 (0.0%)        |
| <b>Frailty phenotype</b>        |               |               |              |              |               |               |                 |                 |
| Non-frail                       | 12843 (48.4%) | 22630 (45.2%) | 591 (44.8%)  | 693 (40.5%)  | 6402 (49.9%)  | 11605 (46.5%) | 65107 (58.5%)   | 60873 (55.6%)   |
| Pre-frail                       | 12554 (47.3%) | 24995 (50.0%) | 668 (50.6%)  | 911 (53.3%)  | 5971 (46.5%)  | 12228 (49.0%) | 44613 (40.1%)   | 46268 (42.3%)   |
| Frail                           | 1149 (4.3%)   | 2415 (4.8%)   | 60 (4.5%)    | 106 (6.2%)   | 462 (3.6%)    | 1111 (4.5%)   | 1627 (1.5%)     | 2306 (2.1%)     |
| <b>Frailty phenotype count</b>  |               |               |              |              |               |               |                 |                 |
| None                            | 12843 (48.4%) | 22630 (45.2%) | 591 (44.8%)  | 693 (40.5%)  | 6402 (49.9%)  | 11605 (46.5%) | 65107 (58.5%)   | 60873 (55.6%)   |
| One                             | 9294 (35.0%)  | 18266 (36.5%) | 493 (37.4%)  | 650 (38.0%)  | 4544 (35.4%)  | 9034 (36.2%)  | 36308 (32.6%)   | 36371 (33.2%)   |
| Two                             | 3260 (12.3%)  | 6729 (13.4%)  | 175 (13.3%)  | 261 (15.3%)  | 1427 (11.1%)  | 3194 (12.8%)  | 8305 (7.5%)     | 9897 (9.0%)     |
| Three                           | 926 (3.5%)    | 1944 (3.9%)   | 46 (3.5%)    | 88 (5.1%)    | 372 (2.9%)    | 892 (3.6%)    | 1398 (1.3%)     | 1978 (1.8%)     |
| Four                            | 206 (0.8%)    | 426 (0.9%)    | 12 (0.9%)    | 18 (1.1%)    | 82 (0.6%)     | 195 (0.8%)    | 216 (0.2%)      | 307 (0.3%)      |
| Five                            | 17 (0.1%)     | 45 (0.1%)     | 2 (0.2%)     | 0 (0.0%)     | 8 (0.1%)      | 24 (0.1%)     | 13 (0.0%)       | 21 (0.0%)       |
| Mean (SD)                       | 0.73 (0.87)   | 0.79 (0.89)   | 0.79 (0.88)  | 0.88 (0.92)  | 0.69 (0.84)   | 0.76 (0.87)   | 0.52 (0.71)     | 0.58 (0.76)     |
| <b>Frailty index</b>            |               |               |              |              |               |               |                 |                 |
| Mean (SD)                       | 0.15 (0.08)   | 0.15 (0.08)   | 0.16 (0.08)  | 0.17 (0.08)  | 0.15 (0.08)   | 0.15 (0.08)   | 0.10 (0.06)     | 0.11 (0.06)     |
| <b>Frailty index categories</b> |               |               |              |              |               |               |                 |                 |
| Non-frail                       | 5168 (19.5%)  | 9229 (18.4%)  | 208 (15.8%)  | 237 (13.9%)  | 2401 (18.7%)  | 4240 (17.0%)  | 46028 (41.3%)   | 42161 (38.5%)   |
| Pre-frail                       | 18213 (68.6%) | 35067 (70.1%) | 908 (68.8%)  | 1190 (69.6%) | 8946 (69.7%)  | 17635 (70.7%) | 62127 (55.8%)   | 63521 (58.0%)   |
| Frail                           | 3165 (11.9%)  | 5744 (11.5%)  | 203 (15.4%)  | 283 (16.5%)  | 1488 (11.6%)  | 3069 (12.3%)  | 3192 (2.9%)     | 3765 (3.4%)     |

Note: SD = standard deviation; GCSEs = general certificate of secondary education; CSE = certificate of secondary education; NVQ = national vocational qualification; HND = higher national diploma; HNC = higher national certificate. <sup>1</sup> also includes 'other professional qualifications'. Cut-offs for frailty index categories were non frail ( $\leq 0.08$ ), pre-frail ( $> 0.08$  and  $< 0.25$ ) and frail ( $\geq 0.25$ ).

## Frailty group differences stratified by sex

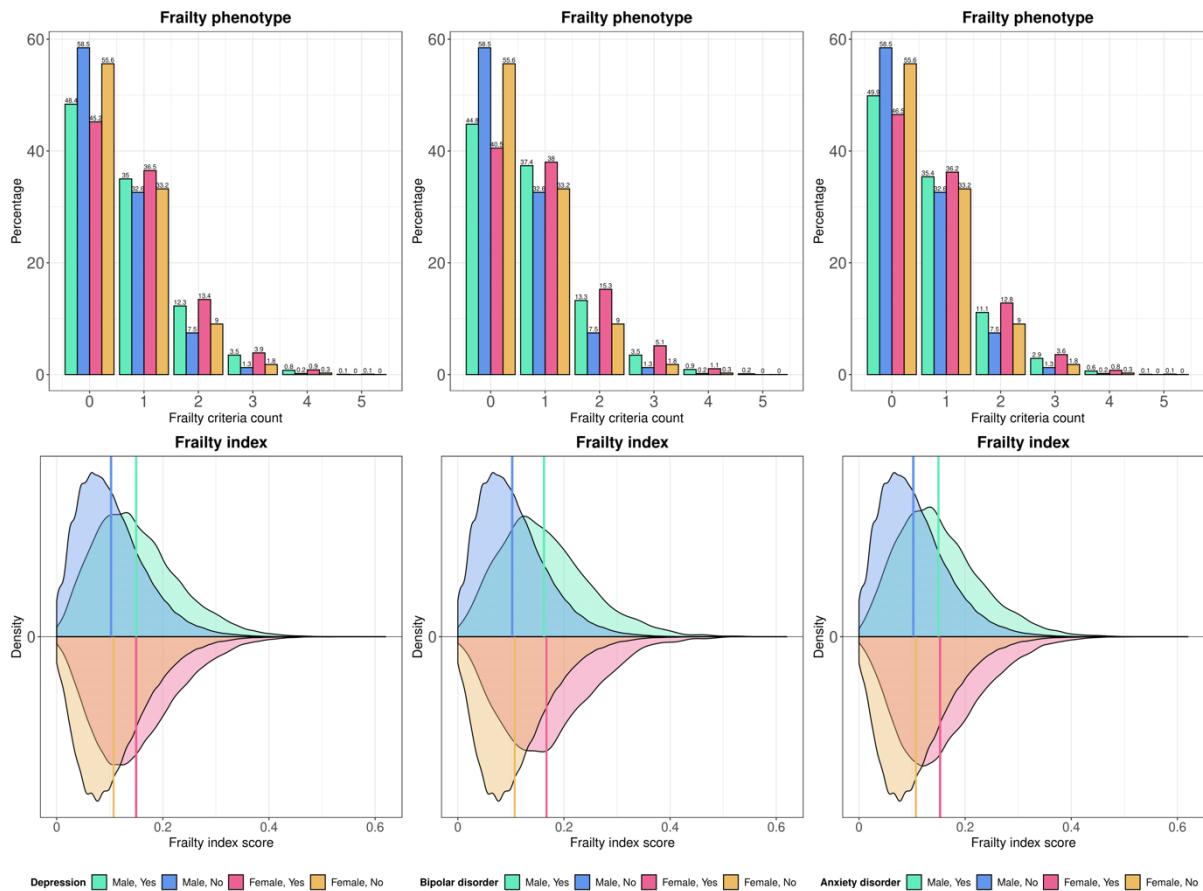

**Figure S2.** Histograms and density plots showing the distribution of the frailty phenotype criteria count (top panels) and the frailty index (bottom panels), respectively, for individuals with and without mental disorders stratified by sex.

## Sex differences in frailty index

**Table S4.** Sex differences in the frailty index

| Term               | SMD   | 95% CI |       | $p_{\text{Bonf.}}$ | $p_{\text{BH}}$ |
|--------------------|-------|--------|-------|--------------------|-----------------|
| No mental disorder | 0.072 | 0.064  | 0.081 | <0.001             | <0.001          |
| Depression         | 0.001 | -0.014 | 0.016 | >0.999             | 0.891           |
| Bipolar disorder   | 0.055 | -0.017 | 0.127 | 0.536              | 0.179           |
| Anxiety disorder   | 0.039 | 0.017  | 0.060 | 0.002              | <0.001          |

*Note:* SMD = standardised mean difference; CI = confidence interval; Bonf. = Bonferroni; BH = Benjamini & Hochberg.

## Sex-stratified regression models

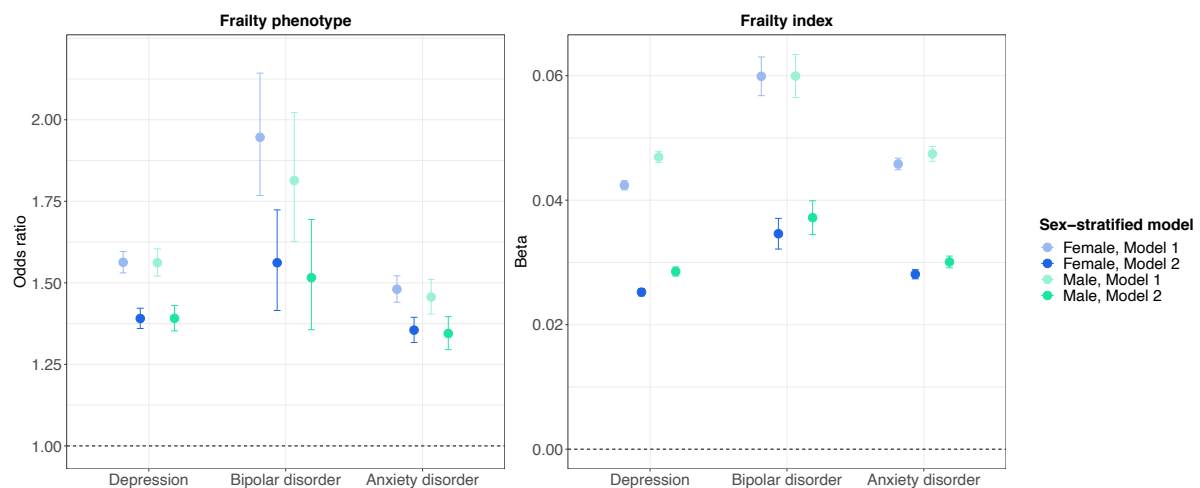

**Figure S3.** Frailty in individuals with mental disorders compared to individuals without mental disorders (reference group) stratified by sex. Estimates shown for the frailty phenotype are odds ratios and 95% confidence intervals (CI) from ordinal logistic regression models, indicating changes in odds of being frailer associated with being in the case group relative to the comparison group without mental disorders. Estimates shown for the frailty index are ordinary least squares regression beta coefficients and 95% CI. Model 1 – unadjusted; Model 2 – adjusted for age, sex, ethnicity, highest qualification, Townsend deprivation index, cohabitation with spouse/partner, smoking status, alcohol intake frequency, systolic and diastolic blood pressure, body mass index, cholesterol, multimorbidity count and assessment centre.

**Table S5.** Frailty in males and females with and without mental disorders

|                          | Males   |        |         |         | Females |       |         |        |       |
|--------------------------|---------|--------|---------|---------|---------|-------|---------|--------|-------|
|                          | Model 1 |        | Model 2 |         | Model 1 |       | Model 2 |        |       |
| <b>Frailty phenotype</b> | OR      | 95% CI |         | OR      | 95% CI  |       | OR      | 95% CI |       |
| No mental disorder       | Ref     | -      | -       | Ref     | -       | -     | Ref     | -      | -     |
| Depression               | 1.562   | 1.521  | 1.604   | 1.391   | 1.353   | 1.431 | 1.563   | 1.531  | 1.596 |
| Bipolar disorder         | 1.814   | 1.627  | 2.022   | 1.516   | 1.356   | 1.694 | 1.946   | 1.768  | 2.143 |
| Anxiety disorder         | 1.457   | 1.404  | 1.511   | 1.345   | 1.295   | 1.396 | 1.480   | 1.441  | 1.521 |
| <b>Frailty index</b>     | $\beta$ | 95% CI |         | $\beta$ | 95% CI  |       | $\beta$ | 95% CI |       |
| No mental disorder       | Ref     | -      | -       | Ref     | -       | -     | Ref     | -      | -     |
| Depression               | 0.047   | 0.046  | 0.048   | 0.029   | 0.028   | 0.029 | 0.042   | 0.042  | 0.043 |
| Bipolar disorder         | 0.060   | 0.056  | 0.063   | 0.037   | 0.034   | 0.040 | 0.060   | 0.057  | 0.063 |
| Anxiety disorder         | 0.047   | 0.046  | 0.049   | 0.030   | 0.029   | 0.031 | 0.046   | 0.045  | 0.047 |

Note: OR = odds ratio;  $\beta$  = ordinary least squares regression beta coefficient; CI = confidence interval; Ref = reference group. All Bonferroni-adjusted  $p$ -values < 0.001. Odds ratios indicate changes in odds of being frailer associated with being in the case group relative to the comparison group without mental disorders. Model 1 – unadjusted; Model 2 – adjusted for age, sex, ethnicity, highest qualification, Townsend deprivation index, cohabitation with spouse/partner, smoking status, alcohol intake frequency, systolic and diastolic blood pressure, body mass index, cholesterol, multimorbidity count and assessment centre.

## Frailty phenotype by age

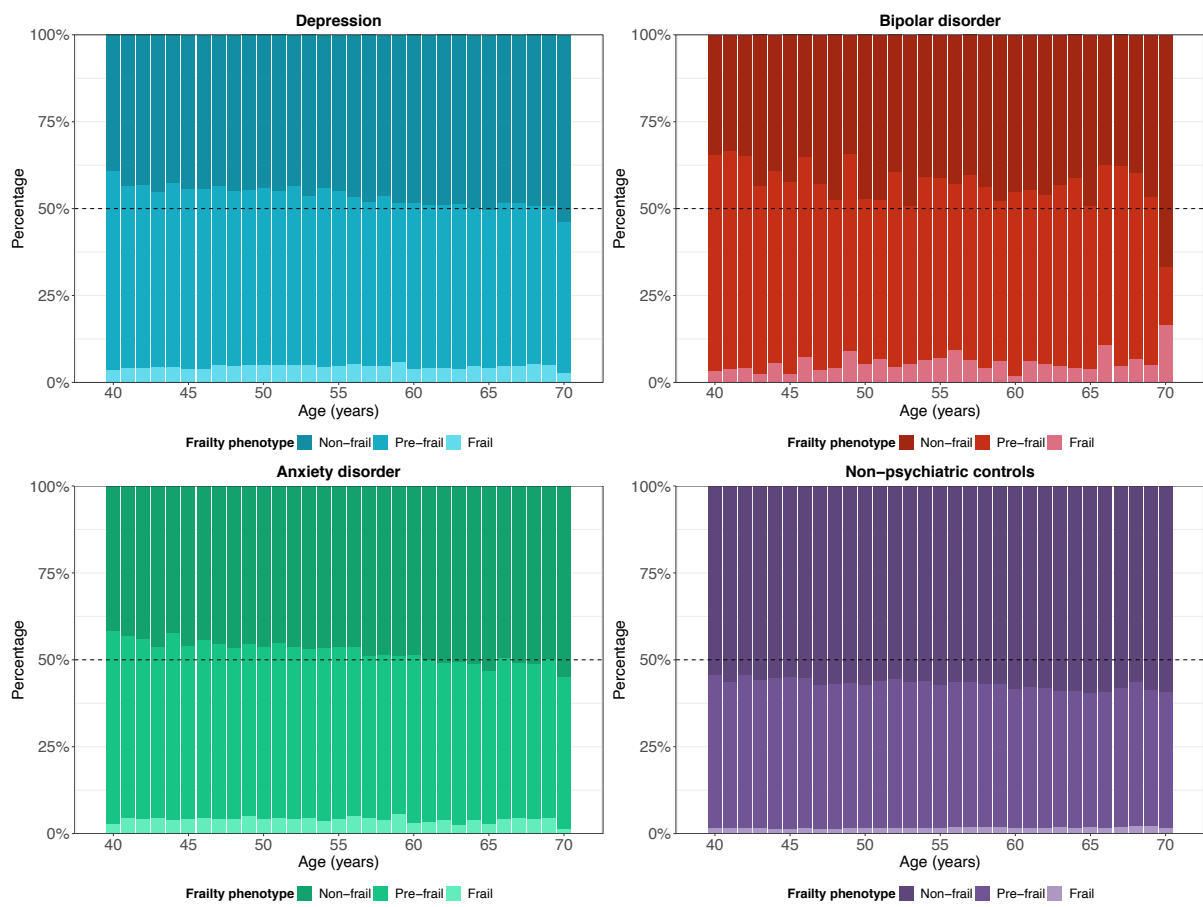

**Figure S4.** Stacked bar charts showing the frailty phenotype by age in individuals with and without mental disorders.

## Descriptive statistics follow-up

**Table S6.** Descriptive statistics follow-up

|                                 |     | <b>Depression</b> |               | <b>Bipolar disorder</b> |               | <b>Anxiety disorder</b> |               |
|---------------------------------|-----|-------------------|---------------|-------------------------|---------------|-------------------------|---------------|
| Full sample size (cases)        |     | 297380 (76586)    |               | 223823 (3029)           |               | 258573 (37779)          |               |
| Person-years follow-up          |     | 3516706           |               | 2654566                 |               | 3066828                 |               |
| Median (IQR) censored           |     | 12.09 (1.35)      |               | 12.19 (1.31)            |               | 12.14 (1.31)            |               |
| Deaths, all (cases)             |     | 17240 (4138)      |               | 13315 (213)             |               | 15052 (1950)            |               |
| <b>Frailty phenotype</b>        |     | <b>Censored</b>   | <b>Deaths</b> | <b>Censored</b>         | <b>Deaths</b> | <b>Censored</b>         | <b>Deaths</b> |
| Non-frail                       | No  | 119473            | 6507          | 119473                  | 6507          | 119473                  | 6507          |
| Non-frail                       | Yes | 33898             | 1575          | 1209                    | 75            | 17184                   | 823           |
| Pre-frail                       | No  | 84865             | 6016          | 84865                   | 6016          | 84865                   | 6016          |
| Pre-frail                       | Yes | 35438             | 2111          | 1463                    | 116           | 17264                   | 935           |
| Frail                           | No  | 3354              | 579           | 3354                    | 579           | 3354                    | 579           |
| Frail                           | Yes | 3112              | 452           | 144                     | 22            | 1381                    | 192           |
| <b>Frailty index categories</b> |     |                   |               |                         |               |                         |               |
| Non-frail                       | No  | 84753             | 3436          | 84753                   | 3436          | 84753                   | 3436          |
| Non-frail                       | Yes | 13927             | 470           | 428                     | 17            | 6408                    | 233           |
| Pre-frail                       | No  | 117045            | 8603          | 117045                  | 8603          | 117045                  | 8603          |
| Pre-frail                       | Yes | 50584             | 2696          | 1960                    | 138           | 25289                   | 1292          |
| Frail                           | No  | 5894              | 1063          | 5894                    | 1063          | 5894                    | 1063          |
| Frail                           | Yes | 7937              | 972           | 428                     | 58            | 4132                    | 425           |

Note: IQR = interquartile range.

## All-cause mortality by case status

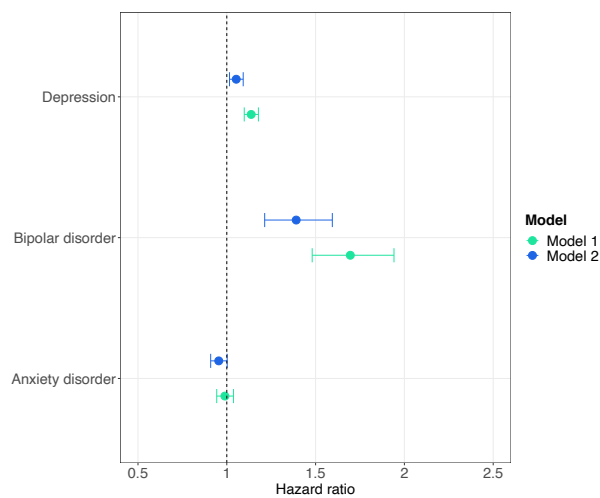

**Figure S5.** All-cause mortality in individuals with mental disorders and without mental disorders (reference group). Hazard ratios (HR) with 95% confidence intervals from Cox proportional hazards models. Age (in years) was used as the underlying time axis. Model 1 – unadjusted; Model 2 – adjusted for sex, ethnicity, highest qualification, Townsend deprivation index, cohabitation with spouse/partner, smoking status, alcohol intake frequency, systolic and diastolic blood pressure, body mass index, cholesterol, multimorbidity count and assessment centre.

**Table S7.** All-cause mortality by case status

|                    | Model 1 |        |       |                    |                 | Model 2 |        |       |                    |                 |
|--------------------|---------|--------|-------|--------------------|-----------------|---------|--------|-------|--------------------|-----------------|
|                    | HR      | 95% CI |       | $p_{\text{Bonf.}}$ | $p_{\text{BH}}$ | HR      | 95% CI |       | $p_{\text{Bonf.}}$ | $p_{\text{BH}}$ |
| No mental disorder | Ref     | -      | -     | -                  | -               | Ref     | -      | -     | -                  | -               |
| Depression         | 1.137   | 1.098  | 1.178 | <0.001             | <0.001          | 1.053   | 1.015  | 1.092 | 0.372              | 0.074           |
| Bipolar disorder   | 1.696   | 1.481  | 1.941 | <0.001             | <0.001          | 1.391   | 1.213  | 1.594 | <0.001             | <0.001          |
| Anxiety disorder   | 0.989   | 0.943  | 1.038 | >0.999             | 0.658           | 0.955   | 0.909  | 1.002 | 0.033              | 0.008           |

*Note:* HR = hazard ratio; CI = confidence interval; Ref = reference group; Bonf. = Bonferroni; BH = Benjamini & Hochberg. Age (in years) was used as the underlying time axis. Model 1 – unadjusted; Model 2 – adjusted for sex, ethnicity, highest qualification, Townsend deprivation index, cohabitation with spouse/partner, smoking status, alcohol intake frequency, systolic and diastolic blood pressure, body mass index, cholesterol, multimorbidity count and assessment centre.

## All-cause mortality by frailty level

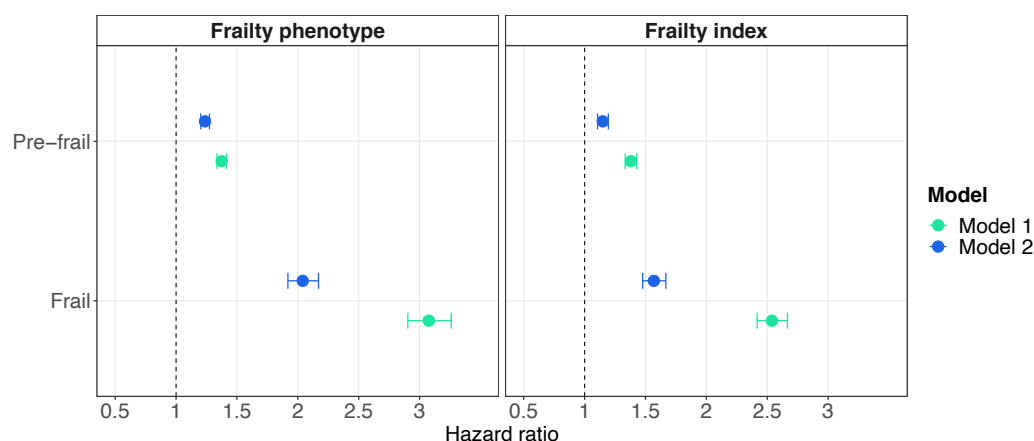

**Figure S6.** All-cause mortality by frailty level (non-frail, pre-frail and frail). Reference group: non-frail participants. Hazard ratios (HR) with 95% confidence intervals from Cox proportional hazards models. Age (in years) was used as the underlying time axis. Model 1 – unadjusted; Model 2 – adjusted for sex, ethnicity, highest qualification, Townsend deprivation index, cohabitation with spouse/partner, smoking status, alcohol intake frequency, systolic and diastolic blood pressure, body mass index, cholesterol, multimorbidity count and assessment centre.

**Table S8.** All-cause mortality by frailty level

| Frailty phenotype               | Model 1 |        |       |                    |                 | Model 2 |        |       |                    |                 |
|---------------------------------|---------|--------|-------|--------------------|-----------------|---------|--------|-------|--------------------|-----------------|
|                                 | HR      | 95% CI |       | $p_{\text{Bonf.}}$ | $p_{\text{BH}}$ | HR      | 95% CI |       | $p_{\text{Bonf.}}$ | $p_{\text{BH}}$ |
| Non-frail                       | Ref     | -      | -     | -                  | -               | Ref     | -      | -     | -                  | -               |
| Pre-frail                       | 1.374   | 1.336  | 1.414 | <0.001             | <0.001          | 1.238   | 1.202  | 1.274 | <0.001             | <0.001          |
| Frail                           | 3.076   | 2.904  | 3.259 | <0.001             | <0.001          | 2.040   | 1.918  | 2.170 | <0.001             | <0.001          |
| <b>Frailty index categories</b> |         |        |       |                    |                 |         |        |       |                    |                 |
| Non-frail                       | Ref     | -      | -     | -                  | -               | Ref     | -      | -     | -                  | -               |
| Pre-frail                       | 1.380   | 1.334  | 1.427 | <0.001             | <0.001          | 1.150   | 1.106  | 1.194 | <0.001             | <0.001          |
| Frail                           | 2.538   | 2.417  | 2.666 | <0.001             | <0.001          | 1.569   | 1.477  | 1.667 | <0.001             | <0.001          |

Note: HR = hazard ratio; CI = confidence interval; Ref = reference group; Bonf. = Bonferroni; BH = Benjamini & Hochberg. Age (in years) was used as the underlying time axis. Model 1 – unadjusted; Model 2 – adjusted for sex, ethnicity, highest qualification, Townsend deprivation index, cohabitation with spouse/partner, smoking status, alcohol intake frequency, systolic and diastolic blood pressure, body mass index, cholesterol, multimorbidity count and assessment centre.



## Survival probabilities by frailty phenotype and case status

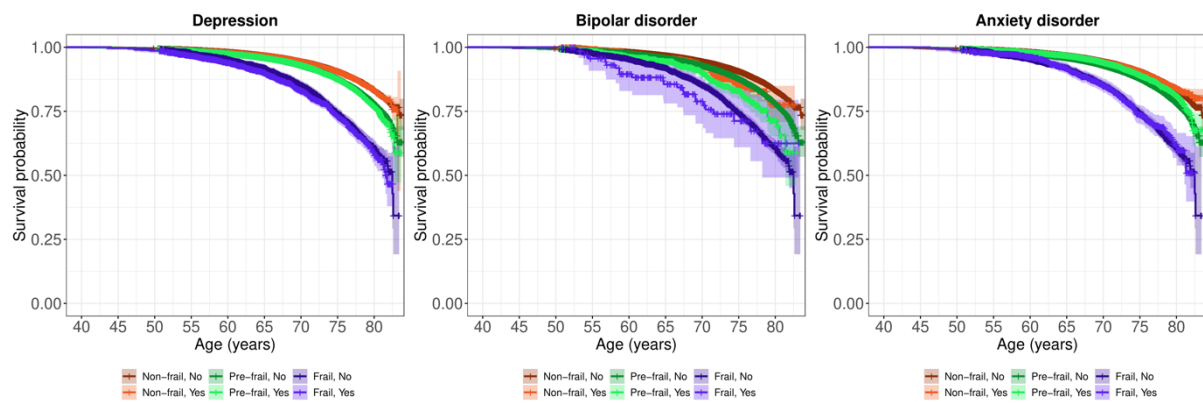

**Figure S7.** Kaplan-Meier survival probabilities for all-cause mortality by frailty phenotype (non-frail, pre-frail and frail) in individuals with mental disorders (yes) and without mental disorders (no). Two observations (one left panel and one right panel) were removed due to the death occurring after the maximum censoring age. All log-rank test  $p$ -values  $< 0.001$ .

## Survival probabilities by frailty index categories and case status

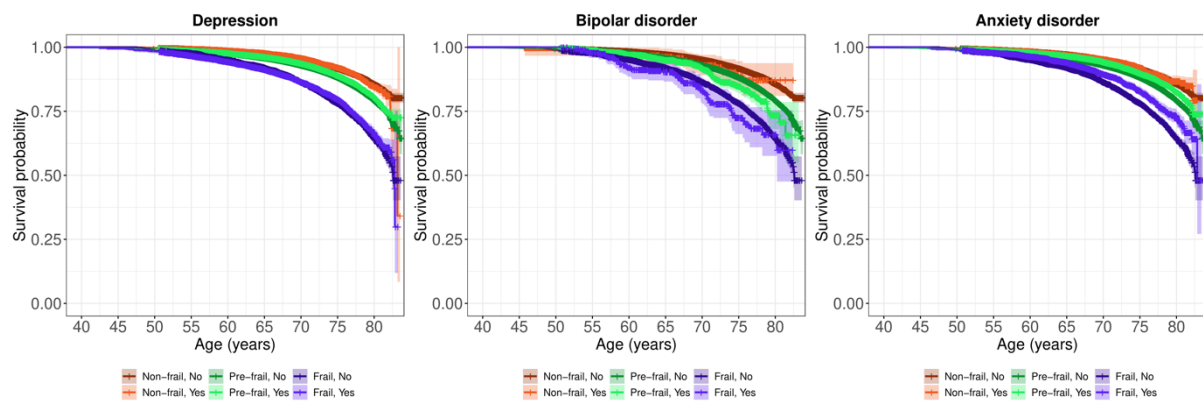

**Figure S8.** Kaplan-Meier survival probabilities for all-cause mortality by frailty index categories (non-frail, pre-frail and frail) in individuals with mental disorders (yes) and without mental disorders (no). All log-rank test  $p$ -values  $< 0.001$ .

## All-cause mortality by frailty phenotype and case status

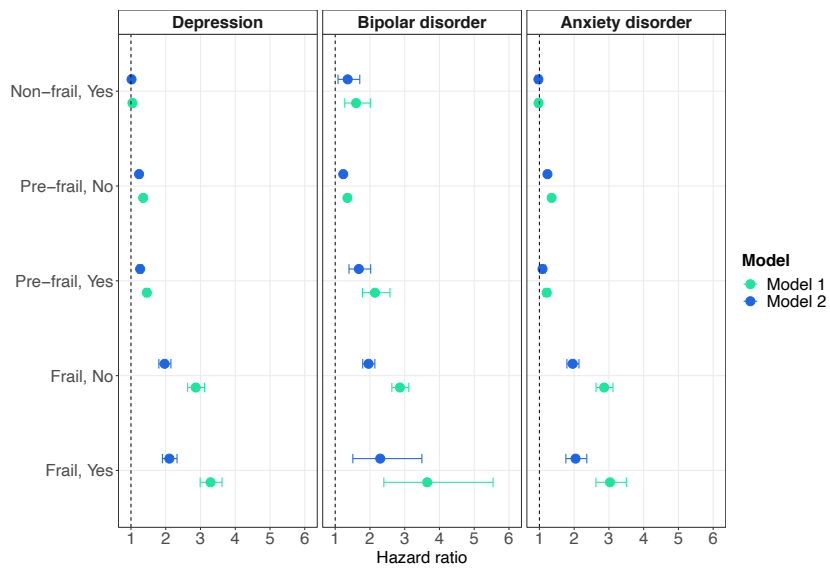

**Figure S9.** All-cause mortality by frailty phenotype (non-frail, pre-frail and frail) in individuals with and without mental disorders. Reference group: non-frail individuals without mental disorders. Hazard ratios (HR) with 95% confidence intervals from Cox proportional hazards models. Age (in years) was used as the underlying time axis. Model 1 – unadjusted; Model 2 – adjusted for sex, ethnicity, highest qualification, Townsend deprivation index, cohabitation with spouse/partner, smoking status, alcohol intake frequency, systolic and diastolic blood pressure, body mass index, cholesterol, multimorbidity count and assessment centre.

## All-cause mortality by frailty index categories and case status

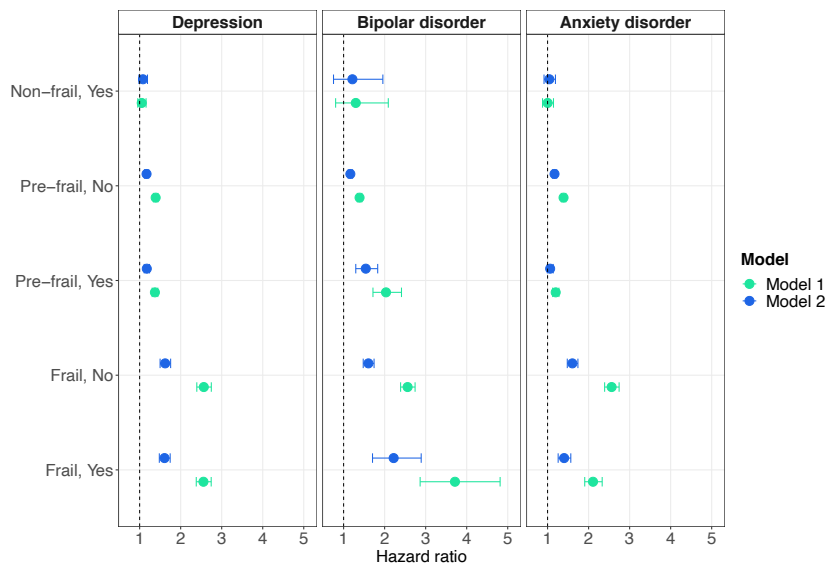

**Figure S10.** All-cause mortality by frailty index categories in individuals with and without mental disorders. Reference group: non-frail individuals without mental disorders. Hazard ratios (HR) with 95% confidence intervals from Cox proportional hazards models. Age (in years) was used as the underlying time axis. Model 1 – unadjusted; Model 2 – adjusted for sex, ethnicity, highest qualification, Townsend deprivation index, cohabitation with spouse/partner, smoking status, alcohol intake frequency, systolic and diastolic blood pressure, body mass index, cholesterol, multimorbidity count and assessment centre.

## All-cause mortality by frailty phenotype and case status stratified by sex

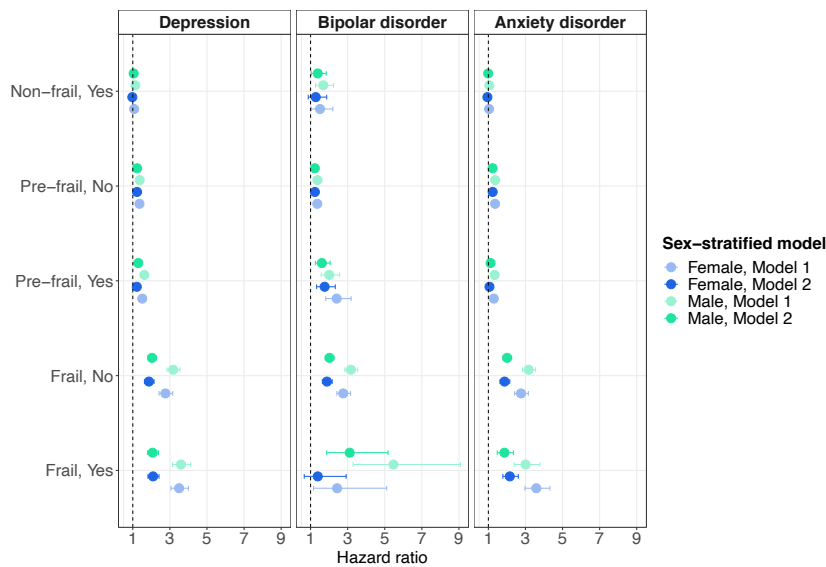

**Figure S11.** All-cause mortality by frailty phenotype (non-frail, pre-frail and frail) in individuals with and without mental disorders stratified by sex. Reference group: non-frail individuals without mental disorders. Hazard ratios (HR) with 95% confidence intervals from Cox proportional hazards models. Age (in years) was used as the underlying time axis. Model 1 – unadjusted; Model 2 – adjusted for ethnicity, highest qualification, Townsend deprivation index, cohabitation with spouse/partner, smoking status, alcohol intake frequency, systolic and diastolic blood pressure, body mass index, cholesterol, multimorbidity count and assessment centre.

**Table S9.** All-cause mortality by frailty phenotype in individuals with and without mental disorders stratified by sex

|                         |     | Males   |        |       |                           |                        |         |       |        |        |                           | Females                |        |       |        |        |                           |                        |        |       |        |        |                           |                        |        |
|-------------------------|-----|---------|--------|-------|---------------------------|------------------------|---------|-------|--------|--------|---------------------------|------------------------|--------|-------|--------|--------|---------------------------|------------------------|--------|-------|--------|--------|---------------------------|------------------------|--------|
|                         |     | Model 1 |        |       |                           |                        | Model 2 |       |        |        |                           | Model 1                |        |       |        |        | Model 2                   |                        |        |       |        |        |                           |                        |        |
| Depression              |     | HR      | 95% CI |       | <i>p</i> <sub>Bonf.</sub> | <i>p</i> <sub>BH</sub> | RD %    | HR    | 95% CI |        | <i>p</i> <sub>Bonf.</sub> | <i>p</i> <sub>BH</sub> | RD %   | HR    | 95% CI |        | <i>p</i> <sub>Bonf.</sub> | <i>p</i> <sub>BH</sub> | RD %   | HR    | 95% CI |        | <i>p</i> <sub>Bonf.</sub> | <i>p</i> <sub>BH</sub> | RD %   |
| Non-frail               | No  | Ref     | -      | -     | -                         | -                      | Ref     | -     | -      | -      | -                         | -                      | Ref    | -     | -      | -      | -                         | -                      | -      | Ref   | -      | -      | -                         | -                      | -      |
| Non-frail               | Yes | 1.139   | 1.057  | 1.228 | 0.019                     | <0.001                 | 1.046   | 0.970 | 1.129  | >0.999 | 0.256                     |                        | 1.076  | 0.991 | 1.168  | >0.999 | 0.104                     |                        | 0.975  | 0.897 | 1.060  | >0.999 | 0.555                     |                        |        |
| Pre-frail               | No  | 1.372   | 1.313  | 1.434 | <0.001                    | <0.001                 | 1.232   | 1.178 | 1.288  | <0.001 | <0.001                    |                        | 1.361  | 1.285 | 1.443  | <0.001 | <0.001                    |                        | 1.230  | 1.160 | 1.304  | <0.001 | <0.001                    |                        |        |
| Pre-frail               | Yes | 1.621   | 1.516  | 1.734 | <0.001                    | <0.001                 | 66.92   | 1.295 | 1.208  | 1.388  | <0.001                    | <0.001                 | 27.26  | 1.509 | 1.402  | 1.623  | <0.001                    | <0.001                 | 40.81  | 1.216 | 1.127  | 1.312  | <0.001                    | <0.001                 | -6.01  |
| Frail                   | No  | 3.176   | 2.845  | 3.546 | <0.001                    | <0.001                 | 2.036   | 1.817 | 2.282  | <0.001 | <0.001                    |                        | 2.759  | 2.413 | 3.153  | <0.001 | <0.001                    |                        | 1.870  | 1.628 | 2.148  | <0.001 | <0.001                    |                        |        |
| Frail                   | Yes | 3.597   | 3.139  | 4.122 | <0.001                    | <0.001                 | 19.33   | 2.070 | 1.797  | 2.384  | <0.001                    | <0.001                 | 3.30   | 3.496 | 3.055  | 4.001  | <0.001                    | <0.001                 | 41.93  | 2.094 | 1.817  | 2.413  | <0.001                    | <0.001                 | 25.71  |
| <b>Bipolar disorder</b> |     | HR      | 95% CI |       | <i>p</i> <sub>Bonf.</sub> | <i>p</i> <sub>BH</sub> | RD %    | HR    | 95% CI |        | <i>p</i> <sub>Bonf.</sub> | <i>p</i> <sub>BH</sub> | RD %   | HR    | 95% CI |        | <i>p</i> <sub>Bonf.</sub> | <i>p</i> <sub>BH</sub> | RD %   | HR    | 95% CI |        | <i>p</i> <sub>Bonf.</sub> | <i>p</i> <sub>BH</sub> | RD %   |
| Non-frail               | No  | Ref     | -      | -     | -                         | -                      | Ref     | -     | -      | -      | -                         | -                      | Ref    | -     | -      | -      | -                         | -                      | Ref    | -     | -      | -      | -                         | -                      | -      |
| Non-frail               | Yes | 1.686   | 1.268  | 2.241 | 0.010                     | <0.001                 |         | 1.385 | 1.041  | 1.843  | 0.758                     | 0.028                  |        | 1.507 | 1.031  | 2.203  | >0.999                    | 0.044                  |        | 1.278 | 0.874  | 1.870  | >0.999                    | 0.247                  |        |
| Pre-frail               | No  | 1.372   | 1.313  | 1.434 | <0.001                    | <0.001                 |         | 1.230 | 1.176  | 1.286  | <0.001                    | <0.001                 |        | 1.362 | 1.285  | 1.443  | <0.001                    | <0.001                 |        | 1.233 | 1.162  | 1.308  | <0.001                    | <0.001                 |        |
| Pre-frail               | Yes | 2.009   | 1.575  | 2.562 | <0.001                    | <0.001                 | 170.79  | 1.609 | 1.260  | 2.054  | 0.004                     | <0.001                 | 165.05 | 2.408 | 1.819  | 3.186  | <0.001                    | <0.001                 | 289.17 | 1.758 | 1.325  | 2.332  | 0.003                     | <0.001                 | 225.47 |
| Frail                   | No  | 3.175   | 2.844  | 3.545 | <0.001                    | <0.001                 |         | 2.018 | 1.799  | 2.264  | <0.001                    | <0.001                 |        | 2.761 | 2.415  | 3.156  | <0.001                    | <0.001                 |        | 1.883 | 1.636  | 2.167  | <0.001                    | <0.001                 |        |
| Frail                   | Yes | 5.468   | 3.294  | 9.079 | <0.001                    | <0.001                 | 105.45  | 3.110 | 1.868  | 5.178  | <0.001                    | <0.001                 | 107.21 | 2.431 | 1.158  | 5.107  | 0.568                     | 0.026                  | -18.70 | 1.386 | 0.658  | 2.919  | >0.999                    | 0.418                  | -56.24 |
| <b>Anxiety disorder</b> |     | HR      | 95% CI |       | <i>p</i> <sub>Bonf.</sub> | <i>p</i> <sub>BH</sub> | RD %    | HR    | 95% CI |        | <i>p</i> <sub>Bonf.</sub> | <i>p</i> <sub>BH</sub> | RD %   | HR    | 95% CI |        | <i>p</i> <sub>Bonf.</sub> | <i>p</i> <sub>BH</sub> | RD %   | HR    | 95% CI |        | <i>p</i> <sub>Bonf.</sub> | <i>p</i> <sub>BH</sub> | RD %   |
| Non-frail               | No  | Ref     | -      | -     | -                         | -                      | Ref     | -     | -      | -      | -                         | -                      | Ref    | -     | -      | -      | -                         | -                      | Ref    | -     | -      | -      | -                         | -                      | -      |
| Non-frail               | Yes | 1.053   | 0.952  | 1.165 | >0.999                    | 0.326                  |         | 0.991 | 0.895  | 1.097  | >0.999                    | 0.863                  |        | 1.038 | 0.935  | 1.153  | >0.999                    | 0.501                  |        | 0.949 | 0.854  | 1.055  | >0.999                    | 0.372                  |        |
| Pre-frail               | No  | 1.372   | 1.313  | 1.434 | <0.001                    | <0.001                 |         | 1.229 | 1.175  | 1.286  | <0.001                    | <0.001                 |        | 1.362 | 1.285  | 1.443  | <0.001                    | <0.001                 |        | 1.232 | 1.161  | 1.307  | <0.001                    | <0.001                 |        |
| Pre-frail               | Yes | 1.339   | 1.214  | 1.476 | <0.001                    | <0.001                 | -9.01   | 1.119 | 1.014  | 1.236  | 0.767                     | 0.028                  | -47.92 | 1.293 | 1.173  | 1.426  | <0.001                    | <0.001                 | -18.91 | 1.060 | 0.960  | 1.172  | >0.999                    | 0.288                  | -73.98 |
| Frail                   | No  | 3.175   | 2.844  | 3.545 | <0.001                    | <0.001                 |         | 2.012 | 1.794  | 2.256  | <0.001                    | <0.001                 |        | 2.761 | 2.415  | 3.156  | <0.001                    | <0.001                 |        | 1.875 | 1.631  | 2.156  | <0.001                    | <0.001                 |        |
| Frail                   | Yes | 3.008   | 2.394  | 3.779 | <0.001                    | <0.001                 | -7.69   | 1.866 | 1.481  | 2.352  | <0.001                    | <0.001                 | -14.40 | 3.584 | 2.974  | 4.319  | <0.001                    | <0.001                 | 46.74  | 2.157 | 1.780  | 2.614  | <0.001                    | <0.001                 | 32.18  |

Note: HR = hazard ratio; CI = confidence interval; RD % = percentage risk difference; Bonf. = Bonferroni; BH = Benjamini & Hochberg. Age (in years) was used as the underlying time axis. Model 1 – unadjusted; Model 2 – adjusted for ethnicity, highest qualification, Townsend deprivation index, cohabitation with spouse/partner, smoking status, alcohol intake frequency, systolic and diastolic blood pressure, body mass index, cholesterol, multimorbidity count and assessment centre.

## All-cause mortality by frailty index categories and case status stratified by sex

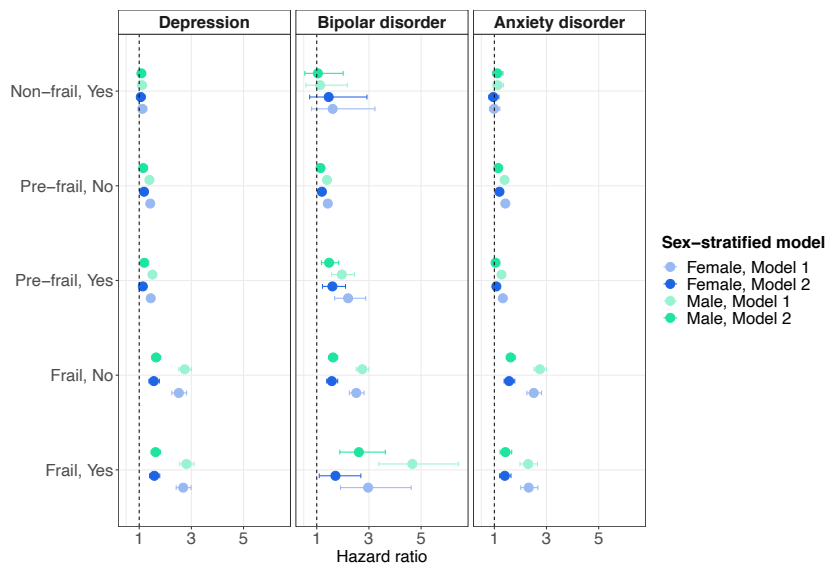

**Figure S12.** All-cause mortality by frailty index categories (non-frail, pre-frail and frail) in individuals with and without mental disorders stratified by sex. Reference group: non-frail individuals without mental disorders. Hazard ratios (HR) with 95% confidence intervals from Cox proportional hazards models. Age (in years) was used as the underlying time axis. Model 1 – unadjusted; Model 2 – adjusted for ethnicity, highest qualification, Townsend deprivation index, cohabitation with spouse/partner, smoking status, alcohol intake frequency, systolic and diastolic blood pressure, body mass index, cholesterol, multimorbidity count and assessment centre.

**Table S10.** All-cause mortality by frailty index categories in individuals with and without mental disorders stratified by sex

|                         |     | Males   |        |       |                           |                        |         |       |        |        |                           | Females                |        |       |        |       |                           |                        |        |  |  |
|-------------------------|-----|---------|--------|-------|---------------------------|------------------------|---------|-------|--------|--------|---------------------------|------------------------|--------|-------|--------|-------|---------------------------|------------------------|--------|--|--|
|                         |     | Model 1 |        |       |                           |                        | Model 2 |       |        |        |                           | Model 1                |        |       |        |       | Model 2                   |                        |        |  |  |
| Depression              |     | HR      | 95% CI |       | <i>p</i> <sub>Bonf.</sub> | <i>p</i> <sub>BH</sub> | RD %    | HR    | 95% CI |        | <i>p</i> <sub>Bonf.</sub> | <i>p</i> <sub>BH</sub> | RD %   | HR    | 95% CI |       | <i>p</i> <sub>Bonf.</sub> | <i>p</i> <sub>BH</sub> | RD %   |  |  |
| Non-frail               | No  | Ref     | -      | -     | -                         | -                      | Ref     | -     | -      | -      | -                         | -                      | Ref    | -     | -      | -     | -                         | -                      | -      |  |  |
| Non-frail               | Yes | 1.107   | 0.970  | 1.264 | >0.999                    | 0.165                  | 1.085   | 0.950 | 1.239  | >0.999 | 0.259                     |                        |        | 1.120 | 0.972  | 1.291 | >0.999                    | 0.146                  |        |  |  |
| Pre-frail               | No  | 1.393   | 1.326  | 1.464 | <0.001                    | <0.001                 | 1.155   | 1.093 | 1.221  | <0.001 | <0.001                    |                        |        | 1.425 | 1.333  | 1.522 | <0.001                    | <0.001                 |        |  |  |
| Pre-frail               | Yes | 1.508   | 1.410  | 1.613 | <0.001                    | <0.001                 | 29.29   | 1.197 | 1.113  | 1.288  | <0.001                    | <0.001                 | 27.15  | 1.443 | 1.334  | 1.560 | <0.001                    | <0.001                 | 4.25   |  |  |
| Frail                   | No  | 2.747   | 2.517  | 2.998 | <0.001                    | <0.001                 |         | 1.649 | 1.490  | 1.825  | <0.001                    | <0.001                 |        | 2.520 | 2.253  | 2.818 | <0.001                    | <0.001                 |        |  |  |
| Frail                   | Yes | 2.813   | 2.552  | 3.101 | <0.001                    | <0.001                 | 3.79    | 1.629 | 1.458  | 1.821  | <0.001                    | <0.001                 | -3.06  | 2.688 | 2.417  | 2.989 | <0.001                    | <0.001                 | 11.08  |  |  |
| <b>Bipolar disorder</b> |     | HR      | 95% CI |       | <i>p</i> <sub>Bonf.</sub> | <i>p</i> <sub>BH</sub> | RD %    | HR    | 95% CI |        | <i>p</i> <sub>Bonf.</sub> | <i>p</i> <sub>BH</sub> | RD %   | HR    | 95% CI |       | <i>p</i> <sub>Bonf.</sub> | <i>p</i> <sub>BH</sub> | RD %   |  |  |
| Non-frail               | No  | Ref     | -      | -     | -                         | -                      | Ref     | -     | -      | -      | -                         | -                      | Ref    | -     | -      | -     | -                         | -                      | -      |  |  |
| Non-frail               | Yes | 1.127   | 0.586  | 2.170 | >0.999                    | 0.744                  | 1.045   | 0.543 | 2.012  | >0.999 | 0.896                     |                        |        | 1.612 | 0.804  | 3.230 | >0.999                    | 0.206                  |        |  |  |
| Pre-frail               | No  | 1.392   | 1.325  | 1.463 | <0.001                    | <0.001                 |         | 1.144 | 1.081  | 1.211  | <0.001                    | <0.001                 |        | 1.423 | 1.331  | 1.521 | <0.001                    | <0.001                 |        |  |  |
| Pre-frail               | Yes | 1.959   | 1.572  | 2.442 | <0.001                    | <0.001                 | 144.45  | 1.474 | 1.179  | 1.842  | 0.020                     | <0.001                 | 227.81 | 2.201 | 1.684  | 2.878 | <0.001                    | <0.001                 | 184.06 |  |  |
| Frail                   | No  | 2.745   | 2.515  | 2.995 | <0.001                    | <0.001                 |         | 1.624 | 1.463  | 1.802  | <0.001                    | <0.001                 |        | 2.515 | 2.248  | 2.813 | <0.001                    | <0.001                 |        |  |  |
| Frail                   | Yes | 4.664   | 3.384  | 6.427 | <0.001                    | <0.001                 | 110.00  | 2.616 | 1.886  | 3.628  | <0.001                    | <0.001                 | 159.07 | 2.969 | 1.909  | 4.619 | <0.001                    | <0.001                 | 30.02  |  |  |
| <b>Anxiety disorder</b> |     | HR      | 95% CI |       | <i>p</i> <sub>Bonf.</sub> | <i>p</i> <sub>BH</sub> | RD %    | HR    | 95% CI |        | <i>p</i> <sub>Bonf.</sub> | <i>p</i> <sub>BH</sub> | RD %   | HR    | 95% CI |       | <i>p</i> <sub>Bonf.</sub> | <i>p</i> <sub>BH</sub> | RD %   |  |  |
| Non-frail               | No  | Ref     | -      | -     | -                         | -                      | Ref     | -     | -      | -      | -                         | -                      | Ref    | -     | -      | -     | -                         | -                      | -      |  |  |
| Non-frail               | Yes | 1.129   | 0.945  | 1.348 | >0.999                    | 0.218                  | 1.114   | 0.933 | 1.331  | >0.999 | 0.259                     |                        |        | 0.992 | 0.812  | 1.212 | >0.999                    | 0.940                  |        |  |  |
| Pre-frail               | No  | 1.393   | 1.326  | 1.464 | <0.001                    | <0.001                 |         | 1.151 | 1.088  | 1.217  | <0.001                    | <0.001                 |        | 1.422 | 1.331  | 1.520 | <0.001                    | <0.001                 |        |  |  |
| Pre-frail               | Yes | 1.275   | 1.165  | 1.394 | <0.001                    | <0.001                 | -30.12  | 1.047 | 0.953  | 1.151  | >0.999                    | 0.360                  | -68.56 | 1.325 | 1.206  | 1.456 | <0.001                    | <0.001                 | -23.02 |  |  |
| Frail                   | No  | 2.747   | 2.517  | 2.998 | <0.001                    | <0.001                 |         | 1.623 | 1.464  | 1.799  | <0.001                    | <0.001                 |        | 2.513 | 2.247  | 2.810 | <0.001                    | <0.001                 |        |  |  |
| Frail                   | Yes | 2.296   | 1.983  | 2.658 | <0.001                    | <0.001                 | -25.81  | 1.425 | 1.220  | 1.666  | <0.001                    | <0.001                 | -31.72 | 2.318 | 2.013  | 2.670 | <0.001                    | <0.001                 | -12.86 |  |  |

Note: HR = hazard ratio; CI = confidence interval; RD % = percentage risk difference; Bonf. = Bonferroni; BH = Benjamini & Hochberg. Age (in years) was used as the underlying time axis. Model 1 – unadjusted; Model 2 – adjusted for ethnicity, highest qualification, Townsend deprivation index, cohabitation with spouse/partner, smoking status, alcohol intake frequency, systolic and diastolic blood pressure, body mass index, cholesterol, multimorbidity count and assessment centre.



## Sensitivity analysis

Individuals with or without comorbid depression and anxiety disorders

**Table S11.** Descriptive statistics follow-up, comorbidity depression and anxiety disorders

|                                 |     | Depression without anxiety disorder |        | Anxiety disorder without depression |        | Comorbid depression and anxiety disorder |        |
|---------------------------------|-----|-------------------------------------|--------|-------------------------------------|--------|------------------------------------------|--------|
| Full sample size (cases)        |     | 283165 (48737)                      |        | 248495 (14067)                      |        | 244506 (23712)                           |        |
| Person-years follow-up          |     | 3351539                             |        | 2950320                             |        | 2899257                                  |        |
| Median (IQR) censored           |     | 12.10 (1.35)                        |        | 12.19 (1.31)                        |        | 12.14 (1.32)                             |        |
| Deaths, all (cases)             |     | 16236 (2823)                        |        | 14261 (848)                         |        | 14204 (1102)                             |        |
| <b>Frailty phenotype</b>        |     | Censored                            | Deaths | Censored                            | Deaths | Censored                                 | Deaths |
| Non-frail                       | No  | 127228                              | 6666   | 127228                              | 6666   | 119473                                   | 6507   |
| Non-frail                       | Yes | 21989                               | 1055   | 7064                                | 386    | 10120                                    | 437    |
| Pre-frail                       | No  | 90285                               | 6160   | 90285                               | 6160   | 84865                                    | 6016   |
| Pre-frail                       | Yes | 22063                               | 1472   | 5854                                | 397    | 11410                                    | 538    |
| Frail                           | No  | 3502                                | 587    | 3502                                | 587    | 3354                                     | 579    |
| Frail                           | Yes | 1862                                | 296    | 301                                 | 65     | 1080                                     | 127    |
| <b>Frailty index categories</b> |     | Censored                            | Deaths | Censored                            | Deaths | Censored                                 | Deaths |
| Non-frail                       | No  | 89247                               | 3513   | 89247                               | 3513   | 84753                                    | 3436   |
| Non-frail                       | Yes | 10097                               | 349    | 3162                                | 129    | 3246                                     | 104    |
| Pre-frail                       | No  | 125561                              | 8822   | 125561                              | 8822   | 117045                                   | 8603   |
| Pre-frail                       | Yes | 31569                               | 1870   | 9133                                | 599    | 16156                                    | 693    |
| Frail                           | No  | 6207                                | 1078   | 6207                                | 1078   | 5894                                     | 1063   |
| Frail                           | Yes | 4248                                | 604    | 924                                 | 120    | 3208                                     | 305    |

Note: IQR = interquartile range.

**Table S12.** All-cause mortality by frailty phenotype, comorbidity depression and anxiety disorders

|                                                 |     | Model 1 |        |       |                           |                        |        | Model 2 |        |       |                           |                        |        |
|-------------------------------------------------|-----|---------|--------|-------|---------------------------|------------------------|--------|---------|--------|-------|---------------------------|------------------------|--------|
| <b>Depression without anxiety disorder</b>      |     | HR      | 95% CI |       | <i>p</i> <sub>Bonf.</sub> | <i>p</i> <sub>BH</sub> | RD %   | HR      | 95% CI |       | <i>p</i> <sub>Bonf.</sub> | <i>p</i> <sub>BH</sub> | RD %   |
| Non-frail                                       | No  | Ref     | -      | -     | -                         | -                      | -      | Ref     | -      | -     | -                         | -                      | -      |
| Non-frail                                       | Yes | 1.101   | 1.032  | 1.175 | 0.113                     | 0.005                  | -      | 1.069   | 1.001  | 1.141 | >0.999                    | 0.057                  | -      |
| Pre-frail                                       | No  | 1.353   | 1.307  | 1.401 | <0.001                    | <0.001                 | -      | 1.236   | 1.193  | 1.280 | <0.001                    | <0.001                 | -      |
| Pre-frail                                       | Yes | 1.640   | 1.550  | 1.735 | <0.001                    | <0.001                 | 81.23  | 1.413   | 1.333  | 1.497 | <0.001                    | <0.001                 | 74.89  |
| Frail                                           | No  | 2.885   | 2.651  | 3.139 | <0.001                    | <0.001                 | -      | 1.983   | 1.817  | 2.164 | <0.001                    | <0.001                 | -      |
| Frail                                           | Yes | 3.557   | 3.166  | 3.996 | <0.001                    | <0.001                 | 35.68  | 2.212   | 1.961  | 2.494 | <0.001                    | <0.001                 | 23.29  |
| <b>Anxiety disorder without depression</b>      |     |         |        |       |                           |                        |        |         |        |       |                           |                        |        |
| Non-frail                                       | No  | Ref     | -      | -     | -                         | -                      | -      | Ref     | -      | -     | -                         | -                      | -      |
| Non-frail                                       | Yes | 0.992   | 0.896  | 1.099 | >0.999                    | 0.883                  | -      | 1.011   | 0.912  | 1.121 | >0.999                    | 0.860                  | -      |
| Pre-frail                                       | No  | 1.353   | 1.307  | 1.401 | <0.001                    | <0.001                 | -      | 1.234   | 1.191  | 1.278 | <0.001                    | <0.001                 | -      |
| Pre-frail                                       | Yes | 1.263   | 1.141  | 1.398 | <0.001                    | <0.001                 | -25.56 | 1.175   | 1.061  | 1.300 | 0.059                     | 0.003                  | -25.43 |
| Frail                                           | No  | 2.885   | 2.652  | 3.139 | <0.001                    | <0.001                 | -      | 1.970   | 1.804  | 2.151 | <0.001                    | <0.001                 | -      |
| Frail                                           | Yes | 3.444   | 2.697  | 4.396 | <0.001                    | <0.001                 | 29.64  | 2.455   | 1.920  | 3.140 | <0.001                    | <0.001                 | 50.10  |
| <b>Comorbid depression and anxiety disorder</b> |     |         |        |       |                           |                        |        |         |        |       |                           |                        |        |
| Non-frail                                       | No  | Ref     | -      | -     | -                         | -                      | -      | Ref     | -      | -     | -                         | -                      | -      |
| Non-frail                                       | Yes | 0.984   | 0.893  | 1.084 | >0.999                    | 0.794                  | -      | 0.955   | 0.866  | 1.054 | >0.999                    | 0.400                  | -      |
| Pre-frail                                       | No  | 1.352   | 1.305  | 1.400 | <0.001                    | <0.001                 | -      | 1.230   | 1.187  | 1.275 | <0.001                    | <0.001                 | -      |
| Pre-frail                                       | Yes | 1.199   | 1.098  | 1.309 | 0.002                     | <0.001                 | -43.46 | 1.047   | 0.958  | 1.145 | >0.999                    | 0.361                  | -79.46 |
| Frail                                           | No  | 2.864   | 2.630  | 3.118 | <0.001                    | <0.001                 | -      | 1.948   | 1.783  | 2.129 | <0.001                    | <0.001                 | -      |
| Frail                                           | Yes | 2.892   | 2.426  | 3.447 | <0.001                    | <0.001                 | 1.52   | 1.885   | 1.577  | 2.254 | <0.001                    | <0.001                 | -6.65  |

Note: HR = hazard ratio; CI = confidence interval; RD % = percentage risk difference; Ref = reference group; Bonf. = Bonferroni; BH = Benjamini & Hochberg. Age (in years) was used as the underlying time axis. Model 1 – unadjusted; Model 2 – adjusted for sex, ethnicity, highest qualification, Townsend deprivation index, cohabitation with spouse/partner, smoking status, alcohol intake frequency, systolic and diastolic blood pressure, body mass index, cholesterol, multimorbidity count and assessment centre.

**Table S13.** All-cause mortality by frailty index categories, comorbidity depression and anxiety disorders

|                                                 |     | Model 1 |        |       |                           |                        |        | Model 2 |        |       |                           |                        |        |
|-------------------------------------------------|-----|---------|--------|-------|---------------------------|------------------------|--------|---------|--------|-------|---------------------------|------------------------|--------|
| <b>Depression without anxiety disorder</b>      |     | HR      | 95% CI |       | <i>p</i> <sub>Bonf.</sub> | <i>p</i> <sub>BH</sub> | RD %   | HR      | 95% CI |       | <i>p</i> <sub>Bonf.</sub> | <i>p</i> <sub>BH</sub> | RD %   |
| Non-frail                                       | No  | Ref     | -      | -     | -                         | -                      | -      | Ref     | -      | -     | -                         | -                      | -      |
| Non-frail                                       | Yes | 1.082   | 0.969  | 1.208 | >0.999                    | 0.195                  | -      | 1.108   | 0.992  | 1.237 | >0.999                    | 0.085                  | -      |
| Pre-frail                                       | No  | 1.372   | 1.319  | 1.427 | <0.001                    | <0.001                 | -      | 1.151   | 1.101  | 1.202 | <0.001                    | <0.001                 | -      |
| Pre-frail                                       | Yes | 1.521   | 1.438  | 1.608 | <0.001                    | <0.001                 | 39.99  | 1.275   | 1.200  | 1.355 | <0.001                    | <0.001                 | 82.72  |
| Frail                                           | No  | 2.522   | 2.355  | 2.700 | <0.001                    | <0.001                 | -      | 1.598   | 1.476  | 1.730 | <0.001                    | <0.001                 | -      |
| Frail                                           | Yes | 2.849   | 2.613  | 3.106 | <0.001                    | <0.001                 | 21.47  | 1.736   | 1.576  | 1.912 | <0.001                    | <0.001                 | 23.03  |
| <b>Anxiety disorder without depression</b>      |     |         |        |       |                           |                        |        |         |        |       |                           |                        |        |
| Non-frail                                       | No  | Ref     | -      | -     | -                         | -                      | -      | Ref     | -      | -     | -                         | -                      | -      |
| Non-frail                                       | Yes | 0.990   | 0.831  | 1.181 | >0.999                    | 0.914                  | -      | 1.036   | 0.869  | 1.235 | >0.999                    | 0.744                  | -      |
| Pre-frail                                       | No  | 1.371   | 1.318  | 1.426 | <0.001                    | <0.001                 | -      | 1.151   | 1.101  | 1.203 | <0.001                    | <0.001                 | -      |
| Pre-frail                                       | Yes | 1.286   | 1.179  | 1.402 | <0.001                    | <0.001                 | -22.97 | 1.143   | 1.045  | 1.250 | 0.104                     | 0.005                  | -5.03  |
| Frail                                           | No  | 2.519   | 2.353  | 2.697 | <0.001                    | <0.001                 | -      | 1.577   | 1.455  | 1.710 | <0.001                    | <0.001                 | -      |
| Frail                                           | Yes | 2.002   | 1.669  | 2.401 | <0.001                    | <0.001                 | -34.04 | 1.410   | 1.170  | 1.700 | 0.009                     | <0.001                 | -28.96 |
| <b>Comorbid depression and anxiety disorder</b> |     |         |        |       |                           |                        |        |         |        |       |                           |                        |        |
| Non-frail                                       | No  | Ref     | -      | -     | -                         | -                      | -      | Ref     | -      | -     | -                         | -                      | -      |
| Non-frail                                       | Yes | 1.040   | 0.856  | 1.264 | >0.999                    | 0.744                  | -      | 1.071   | 0.881  | 1.302 | >0.999                    | 0.565                  | -      |
| Pre-frail                                       | No  | 1.389   | 1.335  | 1.446 | <0.001                    | <0.001                 | -      | 1.165   | 1.114  | 1.219 | <0.001                    | <0.001                 | -      |
| Pre-frail                                       | Yes | 1.146   | 1.056  | 1.244 | 0.031                     | 0.001                  | -62.41 | 1.005   | 0.923  | 1.095 | >0.999                    | 0.914                  | -97.00 |
| Frail                                           | No  | 2.561   | 2.391  | 2.744 | <0.001                    | <0.001                 | -      | 1.594   | 1.469  | 1.730 | <0.001                    | <0.001                 | -      |
| Frail                                           | Yes | 2.167   | 1.928  | 2.437 | <0.001                    | <0.001                 | -25.23 | 1.397   | 1.232  | 1.584 | <0.001                    | <0.001                 | -33.11 |

Note: HR = hazard ratio; CI = confidence interval; RD % = percentage risk difference; Ref = reference group; Bonf. = Bonferroni; BH = Benjamini & Hochberg. Age (in years) was used as the underlying time axis. Model 1 – unadjusted; Model 2 – adjusted for sex, ethnicity, highest qualification, Townsend deprivation index, cohabitation with spouse/partner, smoking status, alcohol intake frequency, systolic and diastolic blood pressure, body mass index, cholesterol, multimorbidity count and assessment centre.
